# Supplementary material for: Altered Cerebral Blood Flow in the Progression of Chronic Kidney Disease
Source: MDPI journal article supplement (doi:10.3390/jpm13010142), 2023-01-11
Supplement: s1 [file s1]

CBF values in the right insula and left hippocampus in CKD and HC

| Group | right_insula | left_hippocampus |
|-------|--------------|------------------|
| HC    | .34          | -.40             |
| HC    | .82          | -.52             |
| HC    | .31          | -.41             |
| HC    | .62          | -.39             |
| HC    | .64          | -.84             |
| HC    | .81          | -.35             |
| HC    | .91          | -.29             |
| HC    | .60          | -.16             |
| HC    | .65          | -.45             |
| HC    | .68          | -.34             |
| HC    | .19          | -.64             |
| HC    | .26          | -.29             |
| HC    | .19          | -.42             |
| HC    | .14          | -.69             |
| HC    | .43          | -.67             |
| HC    | .28          | -.38             |
| HC    | .56          | -1.00            |
| HC    | .61          | -.14             |
| HC    | .40          | -.38             |
| HC    | .60          | -.04             |



|      |      |      |
|------|------|------|
| HC   | .70  | .09  |
| HC   | .43  | -.35 |
| HC   | .55  | -.25 |
| HC   | .64  | -.58 |
| HC   | .29  | -.54 |
| HC   | .33  | -.60 |
| HC   | .46  | -.38 |
| HC   | .24  | -.11 |
| HC   | .62  | -.19 |
| HC   | .07  | -.52 |
| HC   | .65  | -.28 |
| CKD4 | .21  | -.10 |
| CKD4 | .11  | -.14 |
| CKD4 | .42  | -.23 |
| CKD4 | .17  | -.20 |
| CKD4 | .19  | -.15 |
| CKD4 | -.68 | .23  |
| CKD4 | .05  | .09  |
| CKD4 | .05  | -.36 |
| CKD4 | .29  | .01  |
| CKD4 | .40  | .36  |
| CKD4 | .43  | -.62 |



|      |      |      |
|------|------|------|
| CKD4 | .07  | .10  |
| CKD4 | -.21 | .80  |
| CKD4 | .04  | .12  |
| CKD4 | -.13 | -.27 |
| CKD4 | .36  | -.19 |
| CKD4 | .56  | .65  |
| CKD4 | .15  | 1.44 |
| CKD4 | -.26 | -.27 |

---

The coordinate points of the ROC curve, and the corresponding sensitivity, 1-specificity.

#### Coordinates of the Curve

Test Result

Variable(s):

left\_hippocampus

| Positive if<br>Greater Than or<br>Equal To <sup>a</sup> | Sensitivity | 1 -<br>Specificity |
|---------------------------------------------------------|-------------|--------------------|
| -2.0027                                                 | 1.000       | 1.000              |
| -0.9190                                                 | 1.000       | 0.968              |
| -0.7650                                                 | 1.000       | 0.935              |
| -0.6827                                                 | 1.000       | 0.903              |
| -0.6554                                                 | 1.000       | 0.871              |
| -0.6308                                                 | 1.000       | 0.839              |



|         |       |       |
|---------|-------|-------|
| -0.6131 | 0.947 | 0.839 |
| -0.5924 | 0.947 | 0.806 |
| -0.5618 | 0.947 | 0.774 |
| -0.5340 | 0.947 | 0.742 |
| -0.5218 | 0.947 | 0.710 |
| -0.4866 | 0.947 | 0.677 |
| -0.4395 | 0.947 | 0.645 |
| -0.4198 | 0.947 | 0.613 |
| -0.4061 | 0.947 | 0.581 |
| -0.3931 | 0.947 | 0.548 |
| -0.3843 | 0.947 | 0.516 |
| -0.3789 | 0.947 | 0.484 |
| -0.3771 | 0.947 | 0.452 |
| -0.3680 | 0.947 | 0.419 |
| -0.3569 | 0.895 | 0.419 |
| -0.3498 | 0.895 | 0.387 |
| -0.3411 | 0.895 | 0.355 |
| -0.3148 | 0.895 | 0.323 |
| -0.2926 | 0.895 | 0.290 |
| -0.2844 | 0.895 | 0.258 |
| -0.2736 | 0.895 | 0.226 |
| -0.2687 | 0.842 | 0.226 |
| -0.2597 | 0.789 | 0.226 |
| -0.2428 | 0.789 | 0.194 |
| -0.2159 | 0.737 | 0.194 |
| -0.1966 | 0.684 | 0.194 |
| -0.1912 | 0.684 | 0.161 |
| -0.1763 | 0.632 | 0.161 |
| -0.1567 | 0.632 | 0.129 |
| -0.1460 | 0.579 | 0.129 |
| -0.1428 | 0.526 | 0.129 |
| -0.1250 | 0.526 | 0.097 |
| -0.1053 | 0.526 | 0.065 |
| -0.0725 | 0.474 | 0.065 |
| -0.0167 | 0.474 | 0.032 |
| 0.0473  | 0.421 | 0.032 |
| 0.0886  | 0.421 | 0.000 |
| 0.0961  | 0.368 | 0.000 |
| 0.1100  | 0.316 | 0.000 |
| 0.1765  | 0.263 | 0.000 |
| 0.2975  | 0.211 | 0.000 |
| 0.5043  | 0.158 | 0.000 |
| 0.7236  | 0.105 | 0.000 |



|        |       |       |
|--------|-------|-------|
| 1.1215 | 0.053 | 0.000 |
| 2.4432 | 0.000 | 0.000 |

### Coordinates of the Curve

Test Result

Variable(s):

right\_insula

| Positive if<br>Greater Than or<br>Equal To <sup>a</sup> | Sensitivity | 1 -<br>Specificity |
|---------------------------------------------------------|-------------|--------------------|
| -1.6790                                                 | 0.000       | 0.000              |
| -0.4712                                                 | 0.053       | 0.000              |
| -0.2367                                                 | 0.105       | 0.000              |
| -0.1677                                                 | 0.158       | 0.000              |
| -0.0427                                                 | 0.211       | 0.000              |
| 0.0439                                                  | 0.263       | 0.000              |
| 0.0484                                                  | 0.316       | 0.000              |
| 0.0582                                                  | 0.368       | 0.000              |
| 0.0678                                                  | 0.421       | 0.000              |
| 0.0891                                                  | 0.421       | 0.032              |
| 0.1234                                                  | 0.474       | 0.032              |
| 0.1451                                                  | 0.474       | 0.065              |
| 0.1612                                                  | 0.526       | 0.065              |
| 0.1781                                                  | 0.579       | 0.065              |
| 0.1889                                                  | 0.632       | 0.065              |
| 0.1923                                                  | 0.632       | 0.097              |
| 0.2013                                                  | 0.632       | 0.129              |
| 0.2257                                                  | 0.684       | 0.129              |
| 0.2533                                                  | 0.684       | 0.161              |
| 0.2741                                                  | 0.684       | 0.194              |
| 0.2868                                                  | 0.684       | 0.226              |
| 0.2911                                                  | 0.684       | 0.258              |
| 0.3025                                                  | 0.737       | 0.258              |
| 0.3206                                                  | 0.737       | 0.290              |
| 0.3344                                                  | 0.737       | 0.323              |



|        |       |       |
|--------|-------|-------|
| 0.3488 | 0.737 | 0.355 |
| 0.3788 | 0.789 | 0.355 |
| 0.4005 | 0.842 | 0.355 |
| 0.4086 | 0.842 | 0.387 |
| 0.4221 | 0.895 | 0.387 |
| 0.4296 | 0.947 | 0.387 |
| 0.4325 | 0.947 | 0.419 |
| 0.4493 | 0.947 | 0.452 |
| 0.5052 | 0.947 | 0.484 |
| 0.5519 | 0.947 | 0.516 |
| 0.5588 | 0.947 | 0.548 |
| 0.5804 | 1.000 | 0.548 |
| 0.6007 | 1.000 | 0.581 |
| 0.6057 | 1.000 | 0.613 |
| 0.6134 | 1.000 | 0.645 |
| 0.6182 | 1.000 | 0.677 |
| 0.6315 | 1.000 | 0.710 |
| 0.6437 | 1.000 | 0.742 |
| 0.6474 | 1.000 | 0.774 |
| 0.6510 | 1.000 | 0.806 |
| 0.6660 | 1.000 | 0.839 |
| 0.6891 | 1.000 | 0.871 |
| 0.7544 | 1.000 | 0.903 |
| 0.8165 | 1.000 | 0.935 |
| 0.8677 | 1.000 | 0.968 |
| 1.9132 | 1.000 | 1.000 |



## Sample size analysis

Through power analysis of the three neurocognitive tests, MOCA, MMSE, and DST, which were significantly different, the required sample sizes were calculated to be 33 for the HC group and 20 for the CKD4 group, which is close to the number of subjects collected in our study; 43 for the HC group and 26 for the CKD4 group for MMSE; and 24 for the HC group and 15 for the CKD4 group for DST.
